# Supplementary material for: Evaluation of the Irritable Bowel Syndrome Quality of Life (IBS-QOL) questionnaire in diarrheal-predominant irritable bowel syndrome patients
Source: Health Qual Life Outcomes. 2013 Dec 13;11:208. doi: 10.1186/1477-7525-11-208 (PMC3895767; doi:10.1186/1477-7525-11-208)
Supplement: Additional file 6: Table S1 — Item-total Correlations and Overall Coefficient α. [file 1477-7525-11-208-S6.pdf]

Supplemental Table 1. Item-total Correlations and Overall Coefficient  $\alpha$ 

| Item                                                                                        | Correlation<br>with Total |
|---------------------------------------------------------------------------------------------|---------------------------|
| 1. I feel helpless because of my bowel problems.                                            | 0.68                      |
| 2. I am embarrassed by the smell caused by my bowel problems.                               | 0.52                      |
| 3. I am bothered by how much time I spend on the toilet.                                    | 0.63                      |
| 4. I feel vulnerable to other illnesses because of my bowel problems.                       | 0.63                      |
| 5. I feel fat because of my bowel problems.                                                 | 0.47                      |
| 6. I feel like I'm losing control of my life because of my bowel problems.                  | 0.76                      |
| 7. I feel my life is less enjoyable because of my bowel problems.                           | 0.72                      |
| 8. I feel uncomfortable when I talk about my bowel problems.                                | 0.55                      |
| 9. I feel depressed about my bowel problems.                                                | 0.73                      |
| 10. I feel isolated from others because of my bowel problems.                               | 0.80                      |
| 11. I have to watch the amount of food I eat because of my bowel problems.                  | 0.56                      |
| 12. Because of my bowel problems, sexual activity is difficult for me.                      | 0.58                      |
| 13. I feel angry that I have bowel problems.                                                | 0.68                      |
| 14. I feel like I irritate others because of my bowel problems.                             | 0.70                      |
| 15. I worry that my bowel problems will get worse.                                          | 0.65                      |
| 16. I feel irritable because of my bowel problems.                                          | 0.73                      |
| 17. I worry that people think I exaggerate my bowel problems.                               | 0.62                      |
| 18. I feel I get less done because of my bowel problems.                                    | 0.75                      |
| 19. I have to avoid stressful situations because of my bowel problems.                      | 0.64                      |
| 20. My bowel problems reduce my sexual desire.                                              | 0.57                      |
| 21. My bowel problems limit what I can wear.                                                | 0.65                      |
| 22. I have to avoid strenuous activity because of my bowel problems.                        | 0.65                      |
| 23. I have to watch the kind of food I eat because of my bowel problems.                    | 0.51                      |
| 24. Because of my bowel problems, I have difficulty being around people I do not know well. | 0.69                      |
| 25. I feel sluggish because of my bowel problems.                                           | 0.67                      |
| 26. I feel unclean because of my bowel problems.                                            | 0.66                      |
| 27. Long trips are difficult for me because of my bowel problems.                           | 0.67                      |
| 28. I feel frustrated that I cannot eat when I want because of my bowel problems.           | 0.68                      |
| 29. It is important to be near a toilet because of my bowel problems.                       | 0.65                      |
| 30. My life revolves around my bowel problems.                                              | 0.77                      |
| 31. I worry about losing control of my bowels.                                              | 0.68                      |
| 32. I fear that I won't be able to have a bowel movement.                                   | 0.29                      |
| 33. My bowel problems are affecting my closest relationships.                               | 0.65                      |
| 34. I feel that no one understands my bowel problems.                                       | 0.66                      |
| Overall Item-total Correlation<br>(95% CI)                                                  | 0.64<br>(0.609, 0.677)    |
| Coefficient $\alpha$<br>(95% CI)                                                            | 0.963<br>(0.959, 0.966)   |
